# Supplementary material for: Cost-Effectiveness Analysis of Hp and New Gastric Cancer Screening Scoring System for Screening and Prevention of Gastric Cancer
Source: MDPI journal article supplement (doi:10.3390/curroncol30010086), 2023-01-13
Supplement: s1 [file s1]

**Table S1.** The parameters of Markov model.

| Parameter                                 |               | Baseline value | range          | distribution | reference     |
|-------------------------------------------|---------------|----------------|----------------|--------------|---------------|
| basic probability                         |               |                |                |              |               |
| Hp infection rate                         |               | 0.5            | 0.4-0.6        | triangle     | [8,25,26]     |
| 14C screening sensitivity                 |               | 0.96           | 0.95-0.96      | $\beta$      | [27]          |
| 14C screening specificity                 |               | 0.93           | 0.91-0.94      | $\beta$      | [27]          |
| Success rate of Hp eradication treatment  |               | 0.81           | 0.73-0.88      | $\beta$      | [28–30]       |
| Incidence of GC in Hp positive population |               | 0.0028         | 0.0018–0.0056  | $\beta$      | [30–34]       |
| Incidence of GC after treatment           |               | 0.0017         | 0.0007–0.0036  | $\beta$      | [30–34]       |
| Incidence of GC in Hp negative population |               | 0.0001         | 0.00006-0.0007 | $\beta$      | [35]          |
| Screening population group                |               |                |                |              |               |
| 40-49                                     | low risk      | 0.9499         |                |              | [11,36–38]    |
|                                           | moderate risk | 0.0501         |                |              |               |
|                                           | high risk     | 0              |                |              |               |
| 50-59                                     | low risk      | 0.5556         |                |              |               |
|                                           | moderate risk | 0.4259         |                |              |               |
|                                           | high risk     | 0.0185         |                |              |               |
| 60-69                                     | low risk      | 0.4454         |                |              |               |
|                                           | moderate risk | 0.4898         |                |              |               |
|                                           | high risk     | 0.0648         |                |              |               |
| ≥70                                       | low risk      | 0.0286         |                |              |               |
|                                           | moderate risk | 0.5571         |                |              |               |
|                                           | high risk     | 0.4143         |                |              |               |
| ESD resection rate                        |               | 0.92           | 0.75-1.0       | $\beta$      | [39,40]       |
| Prevalence                                |               |                |                |              |               |
|                                           | AG            | 0.25           | 0.08-0.8       | $\beta$      | [41,42]       |
|                                           | IM            | 0.35           | 0.14-0.48      | $\beta$      | [43–45]       |
|                                           | dysplasia     | 0.06           | 0.05-0.09      | $\beta$      | [45]          |
|                                           | GC            | 0.0003         | 0.0003-0.00037 | $\beta$      | [8,46]        |
| low risk                                  | AG            | 0.0928         |                |              | [36–38,47,48] |
|                                           | IM            | 0.0899         |                |              |               |
|                                           | dysplasia     | 0.0683         |                |              |               |
|                                           | GC            | 0.0017         |                |              |               |
| moderate risk                             | AG            | 0.1669         |                |              |               |
|                                           | IM            | 0.1273         |                |              |               |
|                                           | dysplasia     | 0.0901         |                |              |               |
|                                           | GC            | 0.0087         |                |              |               |
| high risk                                 | AG            | 0.3149         |                |              |               |
|                                           | IM            | 0.2545         |                |              |               |
|                                           | dysplasia     | 0.1699         |                |              |               |
|                                           | GC            | 0.035          |                |              |               |
| GC stage at diagnosis                     | Stage I       | II             | III            | IV           |               |
| Screening population                      | 0.85          | 0.04           | 0.08           | 0.03         | [15,49,50]    |
| no screening population                   | 0.07          | 0.17           | 0.33           | 0.43         |               |
| Transition probability                    |               |                |                |              |               |
| Hp infected gastritis- AG                 |               | 0.018          | 0.005-0.05     | $\beta$      | [42,51]       |
| Hp uninfected gastritis- AG               |               | 0.005          | 0.001-0.05     | $\beta$      |               |
| AG -IM                                    |               | 0.009          | 0.001-0.20     | $\beta$      |               |
| AG- gastritis                             |               | 0.0086         | 0.0005-0.0099  | $\beta$      |               |

|                                    |                            |         |               |          |                                                   |
|------------------------------------|----------------------------|---------|---------------|----------|---------------------------------------------------|
| IM- dysplasia                      |                            | 0.007   | 0.001-0.09    | $\beta$  |                                                   |
| dysplasia-GC                       |                            | 0.0026  | 0.0019-0.0035 | $\beta$  | [52]                                              |
| Stage I-II                         |                            | 0.0241  |               |          | [53,54]                                           |
| Stage II-III                       |                            | 0.0468  |               |          |                                                   |
| Stage III-IV                       |                            | 0.271   |               |          |                                                   |
| Population mortality               |                            | 0.00714 |               |          | National Bureau of statistics data 2020           |
| 5-year survival rate               | Stage I                    | 0.933   | 0.903–0.963   | $\beta$  |                                                   |
|                                    | Stage II                   | 0.700   | 0.672–0.728   | $\beta$  |                                                   |
|                                    | Stage III                  | 0.412   | 0.388–0.436   | $\beta$  |                                                   |
|                                    | Stage IV                   | 0.152   | 0.135–0.169   | $\beta$  |                                                   |
| Cost (yuan / person / year)        |                            |         |               |          |                                                   |
|                                    | 14C                        | 180     | 90-360        | triangle | Charging standard of Taiyuan third class hospital |
|                                    | NGCS                       | 500     | 250-1000      | triangle |                                                   |
|                                    | Hp treatment               | 400     | 200-800       | triangle |                                                   |
|                                    | endoscopy                  | 300     | 150-600       | triangle |                                                   |
|                                    | Pathology                  | 117     | 58.5-234      | triangle |                                                   |
|                                    | Atrophy/ IM                | 5000    | 2500-10000    | triangle | Expert advice                                     |
|                                    | ESD                        | 15000   | 7500-30000    | triangle |                                                   |
| Stage I                            | first year                 | 87000   | 43500-174000  | triangle | Expert advice , [15]                              |
|                                    | subsequent year            | 12000   | 6000-24000    | triangle |                                                   |
| Stage II                           | first year                 | 163000  | 81500-326000  | triangle |                                                   |
|                                    | subsequent year            | 28000   | 14000-56000   | triangle |                                                   |
| Stage III                          | first year                 | 159000  | 79500-318000  | triangle |                                                   |
|                                    | subsequent year            | 18000   | 9000-36000    | triangle |                                                   |
| Stage IV                           | first year                 | 230000  | 115000-460000 | triangle |                                                   |
|                                    | subsequent year            | 44000   | 22000-88000   | triangle |                                                   |
| utility                            |                            |         |               |          |                                                   |
|                                    | Hp infection               | 0.89    | 0.8–1.0       | triangle | [55]                                              |
|                                    | gastritis/AG/IM/ dysplasia | 0.98    | 0.9–1.0       | $\beta$  | [42]                                              |
|                                    | Stage I                    | 0.88    | 0.6–1.0       | $\beta$  | [42,50,56]                                        |
|                                    | Stage II                   | 0.86    | 0.62–0.99     | $\beta$  |                                                   |
|                                    | Stage III                  | 0.77    | 0.58–0.95     | $\beta$  |                                                   |
|                                    | Stage IV                   | 0.68    | 0.51–0.84     | $\beta$  |                                                   |
|                                    | clinical diagnosis GC      | 0.49    | 0.17-0.79     | $\beta$  | [21]                                              |
| discount rate                      |                            | 0.03    | 0-0.06        |          |                                                   |
| Population life expectancy (years) |                            | 77.3    | -             | -        | National Bureau of statistics data 2019           |
| Per capita GDP                     |                            | 80976   |               |          | National Bureau of statistics data 2020           |

Notes: AG, atrophic gastritis; IM, intestinal metaplasia; GC, Gastric cancer; Hp, helicobacter pylori; NGCS, new gastric cancer screening scoring system; ESD, endoscopic submucosal dissection; GDP, gross domestic product.
